# Supplementary material
Source: publisher figshare collection journal article supplement (https://tandf.figshare.com/articles/dataset/_/5633902)
Supplement: Supplementary file 1 [file 1]

CLUMPAK main pipeline - Job 1476802053 summary

Major modes for the uploaded data:

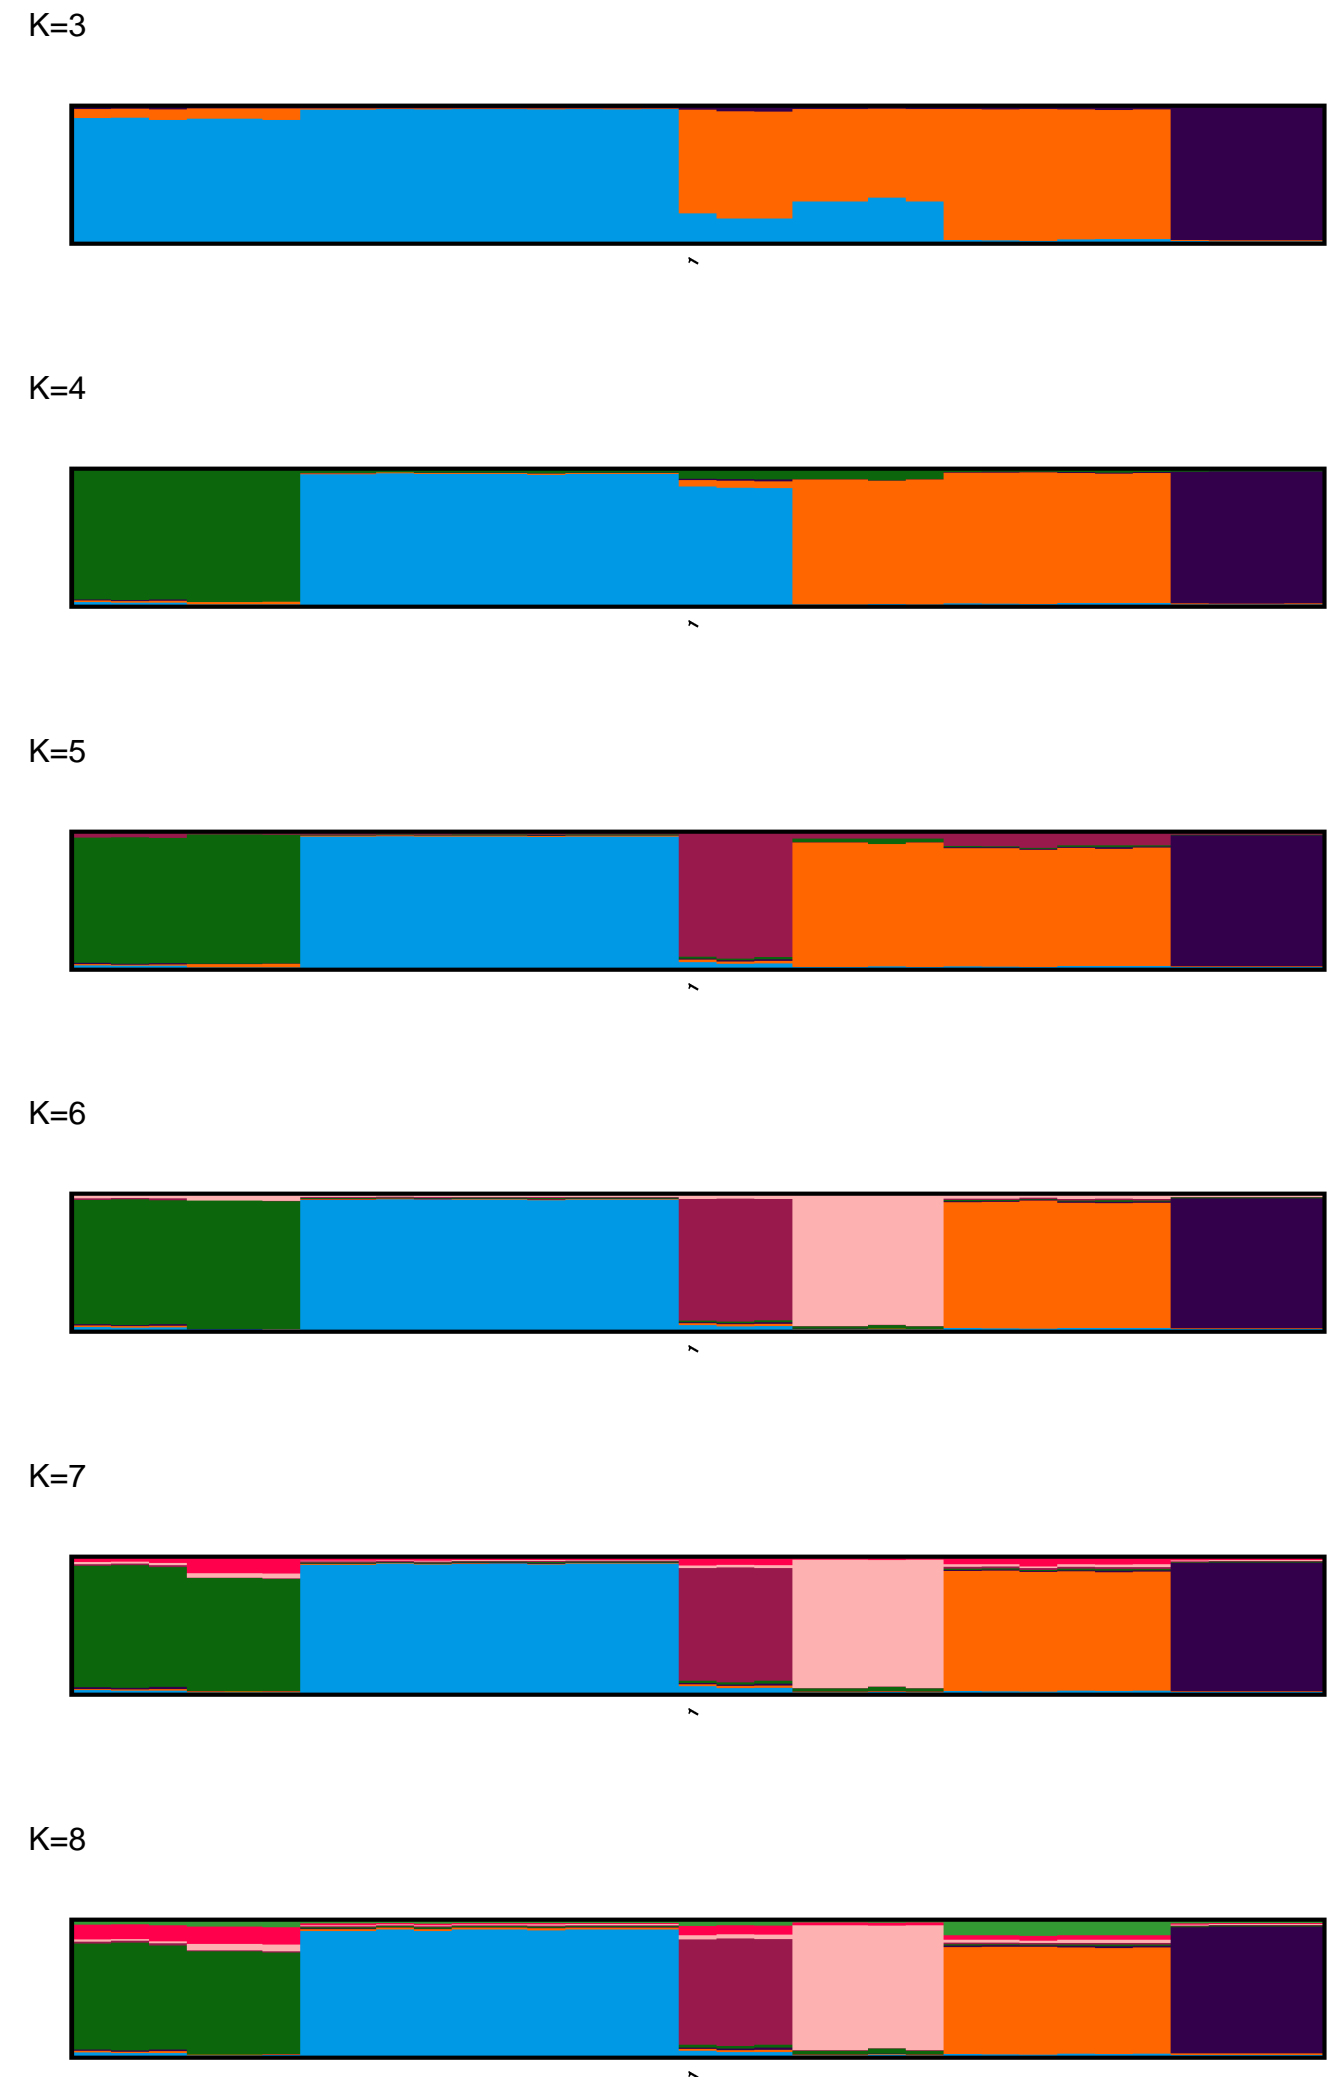

Minor modes for the uploaded data:

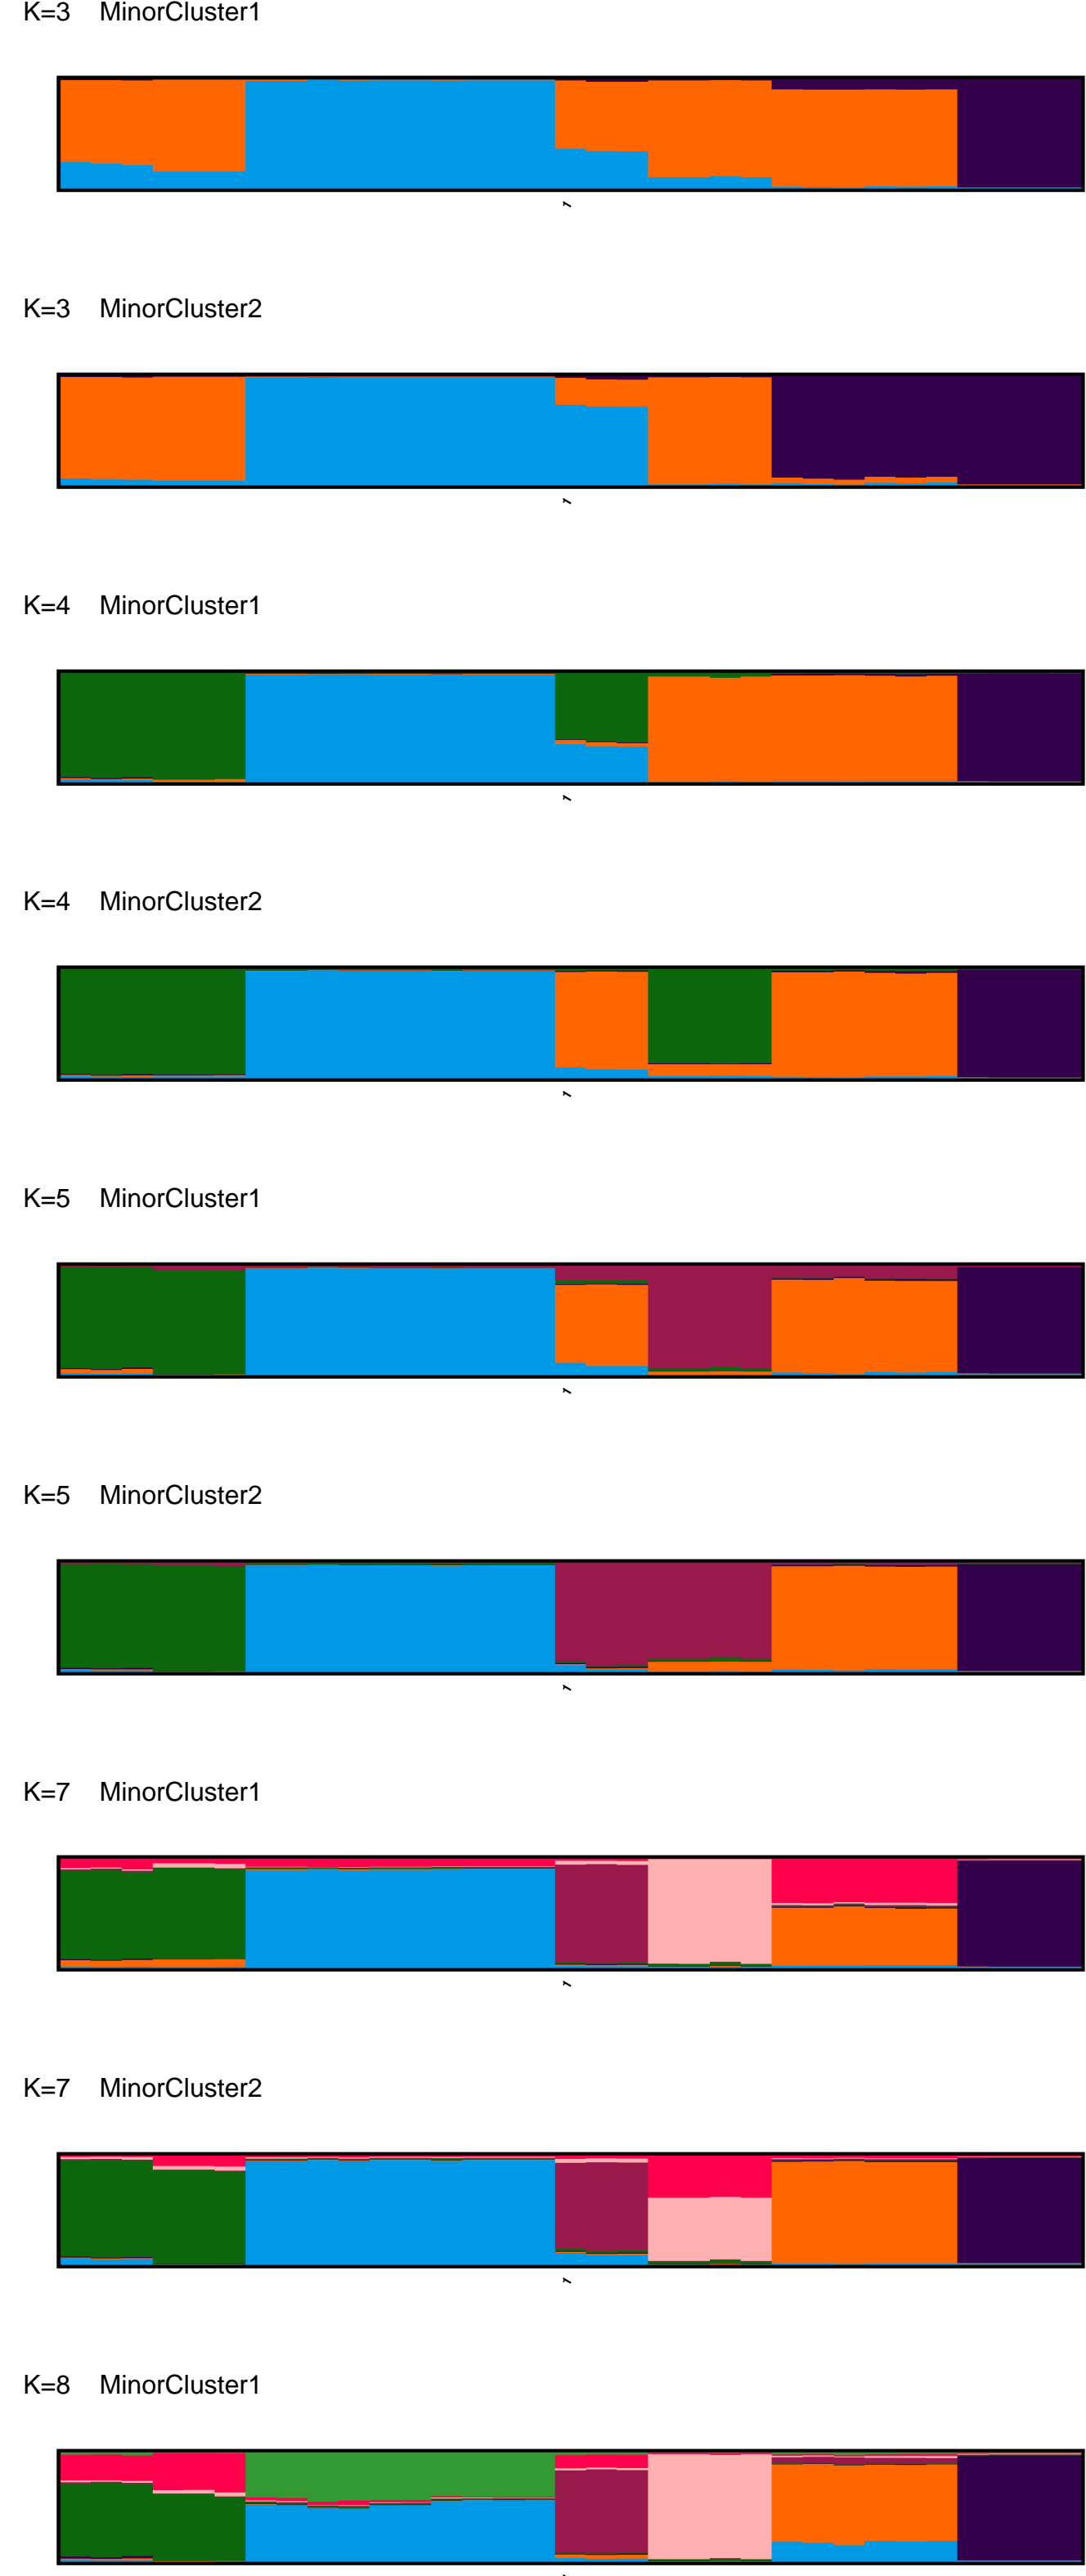

Division of runs by mode:

|     |                   |
|-----|-------------------|
| K=3 | 11/20, 5/20, 4/20 |
| K=4 | 10/20, 6/20, 4/20 |
| K=5 | 9/20, 9/20, 2/20  |
| K=6 | 19/20             |
| K=7 | 14/20, 3/20, 2/20 |
| K=8 | 17/20, 2/20       |
